# Supplementary material for: The Clamp-Like Index
Source: Oxford University Press journal article supplement (doi:10.2337/dc07-0422), 2007-08-28
Supplement: dc070422tab1onlineappendix.doc [file dc070422tab1onlineappendix.doc]

**Tables**

**Table 1**. Anthropometrical characteristics, serum creatinine concentrations and glomerular filtration rates (GFR) as well as indices obtained from oGTT [OGIS 120min, OGIS 180min (1), mcrest (oGTT) by *Stumvoll* et al. (2), *Matsuda*-*DeFronzo*-Index (3)] and fasting [HOMA (4), QUICKI (5)] of all subjects, *subgroup 1* (NOFF and OFF), and *subgroup 2* (normal weight, overweight, obese and morbid obese), and *subgroup 3* (females and males). Data are given as means±SE. BMI, body mass index; GFR, glomerular filtration rate.

|  |  |  |  |  |  |  |  |  |  |  |  |  |
| --- | --- | --- | --- | --- | --- | --- | --- | --- | --- | --- | --- | --- |
|  | **n** | **Gender  (f/m)** | **Age (years)** | **BMI (kg/m2)** | **Serum creatinine (mg/dL)** | **GFR**  **(ml·min-1· ·1.73 m-2)** | **OGIS 120min (ml·min-1·m-2)** | **OGIS 180min (ml·min-1·m-2)** | **MCRest (oGTT)** | ***Matsuda*-*DeFronzo*-Index** | **HOMA** | **QUICKI** |
|  |  |  |  |  |  |  |  |  |  |  |  |  |
| **All** | 89 | 58/31 | 45±1 | 27.5±0.8 | 0.82±0.02 | 92±2 | 431±7 | 449±8 | 8.1±0.4 | 6.0±0.4 | 0.687±0.066 | 0.352±0.004 |
|  |  |  |  |  |  |  |  |  |  |  |  |  |
| ***Subgroup 1*** |  |  |  |  |  |  |  |  |  |  |  |  |
| NOFF | 40 | 30/10 | 44±1 | 25.6±0.6 | 0.83±0.02 | 89±3 | 444±7 | 455±8 | 9.1±0.2 **#** | 6.4±0.4 | 0.702±0.061 | 0.357±0.004 |
| OFF | 24 | 18/6 | 47±2 | 27.0±1.1 | 0.79±0.02 | 92±3 | 421±18 | 439±22 | 7.6±0.6 **#** | 6.4±1.3 | 0.819±0.213 | 0.355±0.011 |
|  |  |  |  |  |  |  |  |  |  |  |  |  |
| ***Subgroup 2*** |  |  |  |  |  |  |  |  |  |  |  |  |
| Normal weight | 42 | 27/15 | 43±1 | 22.2±0.2 | 0.83±0.02 | 92±2 | 472±6 | 491±11 | 10.3±0.2 | 7.8±0.7 | 0.885±0.118 | 0.369±0.005 |
| Overweight | 28 | 17/11 | 48±1 | 27.4±0.3 **§** | 0.84±0.03 | 89±3 | 410±10 **§** | 427±12 **§** | 8.0±0.3 **§** | 5.0±0.4 **§** | 0.568±0.056 | 0.346±0.026 **§** |
| Obese | 11 | 8/3 | 48±2 | 33.7±0.7 **§,&** | 0.77±0.06 | 97±7 | 383±18 **§** | 386±18 **§** | 5.3±0.7 **§,&** | 4.6±1.1 | 0.574±0.172 | 0.340±0.012 |
| Morbid obese | 8 | 6/2 | 42±3 | 47.9±2.4 **§,&,$** | 0.77±0.04 | 92±2 | 348±19 **§,&** | 386±19 **§** | 0.4±0.8 **§,&,$** | 2.0±0.4 **§** | 0.212±0.049 **§** | 0.299±0.009 **§,&,$** |
|  |  |  |  |  |  |  |  |  |  |  |  |  |
| ***Subgroup 3*** |  |  |  |  |  |  |  |  |  |  |  |  |
| Females | 58 | 58/0 | 45±1 | 27.9±1.0 | 0.76±0.02***** | 91±2 | 430±9 | 441±10 | 7.8±0.4 | 6.3±0.6 | 0.759±0.097 | 0.356±0.005 |
| Males | 31 | 0/31 | 45±1 | 26.9±1.4 | 0.94±0.02***** | 94±2 | 431±11 | 463±14 | 8.6±0.6 | 5.4±0.4 | 0.551±0.045 | 0.344±0.005 |
|  |  |  |  |  |  |  |  |  |  |  |  |  |

*, p<10-10 females vs. males; #, p<0.02 OFF vs. NOFF; §, p<0.05 vs. normal-weight, &, p<0.05 vs. overweight, $, p<0.05 vs. obese.
