# Supplementary material for: The Clamp-Like Index
Source: Oxford University Press journal article supplement (doi:10.2337/dc07-0422), 2007-08-28
Supplement: dc070422tab2onlineappendix.doc [file dc070422tab2onlineappendix.doc]

**Table 2**. Correlations (*Pearson*’s moment products) of GIR100-120min with oGTT plasma concentrations of glucose, insulin and C-peptide at their drawing time and their AUCs, calculated with the trapezoidal rule.

|  |  |  |  |  |  |  |  |  |  |  |  |
| --- | --- | --- | --- | --- | --- | --- | --- | --- | --- | --- | --- |
| **Time (min)** | **0** | **10** | **20** | **30** | **40** | **60** | **90** | **120** | **150** | **180** | **AUC** |
|  |  |  |  |  |  |  |  |  |  |  |  |
| Plasma glucose | -0.260 ***** | -0.262 ***** | -0.291 ***** | -0.434 **#** | -0.483 **#** | -0.535 **§** | -0.561 **§** | -0.488 **#** | -0.429 **#** | -0.260 ***** | -0.555 **§** |
| **Plasma insulin** | -0.496 **#** | -0.412 **#** | -0.445 **#** | -0.494 **#** | -0.518 **#** | -0.517 **#** | -0.615 **§** | -0.584 **§** | -0.543 **#** | -0.506 **#** | -0.624 **§** |
| **Plasma C-peptide** | -0.581 **§** | -0.515 **#** | -0.481 **#** | -0.518 **#** | -0.483 **#** | -0.523 **#** | -0.563 **§** | -0.599 **§** | -0.605 **§** | -0.617 **§** | -0.637 **§** |
|  |  |  |  |  |  |  |  |  |  |  |  |

*, p<0.02; #, p<0.0001; §, p<10-7
