# Supplementary material for: The Clamp-Like Index
Source: Oxford University Press journal article supplement (doi:10.2337/dc07-0422), 2007-08-28
Supplement: dc070422tab3onlineappendix.doc [file dc070422tab3onlineappendix.doc]

**Table 3**. The associations of metabolic characteristics (Model 1) and insulin sensitivity indices obtained from oGTT and fasting parameters (Model 2) with GIR 100-120 min using multiple linear regression analyses.

| **Model 1** Predictors of GIR 100-120min  r=0.66 | **Coefficients** | **SE** | **p** |
| --- | --- | --- | --- |
| **CLIX** | 0.49 | 0.08 | 10-7 |
| **Waist circumference** | -0.06 | 0.02 | 0.004 |
| Factors not included in the model: systolic blood pressure, fasting plasma glucose, C-peptide, insulin, HDL cholesterol, HbA1c (each p>0.2) | | | |
|  | **Coefficients** | **SE** | **p** |
| **Model 2** Predictors of GIR 100-120min:  r=0.66 |  |  |  |
| **CLIX** | 0.65 | 0.08 | 10-12 |
| Factors not included in the model: OGIS 120min (p=0.04), HOMA, *Matsuda-DeFronzo*-Index (each p>0.08) | | | |
